# Supplementary material for: Gliomas Infiltrating the Corpus Callosum: A Systematic Review of the Literature
Source: Cancers (Basel). 2022 May 19;14(10):2507. doi: 10.3390/cancers14102507 (PMC9139932; doi:10.3390/cancers14102507)
Supplement: Supplementary file 1 [file cancers-14-02507-s001.zip › Supplementary File 1 - Overview of all included studies.pdf]

Supplementary File S1. Overview of all included studies.

|    | Authors - Year                  | Study Design - Level of evidence | Patients No./ male | Age years median (range) | Location in Corpus Callosum No. patients (percentage)            | Unilateral or Butterfly Invasion No. patients (percentage) | WHO Grade – Type No. patients (percentage)     | Extent of Tumor Resection No. patients (percentage) | Resection of Corpus Callosum No. patients (percentage) | Surgical Complications No. patients (percentage) | Radiotherapy No. patients (percentage) | Chemotherapy No. patients (percentage) | Symptom Improve No. patients (percentage) | Recurrence No. patients (percentage) | Progression Free Survival months median (range) | Overall Survival months median (range) | Alive No. patients (percentage) |
|----|---------------------------------|----------------------------------|--------------------|--------------------------|------------------------------------------------------------------|------------------------------------------------------------|------------------------------------------------|-----------------------------------------------------|--------------------------------------------------------|--------------------------------------------------|----------------------------------------|----------------------------------------|-------------------------------------------|--------------------------------------|-------------------------------------------------|----------------------------------------|---------------------------------|
| 1  | Cabot et al. – 1949 [61]        | Case report V                    | 1 / 1 (100%)       | 62                       | Body                                                             | Butterfly                                                  | 4-GBM                                          | Biopsy                                              | No                                                     | 0 (0%)                                           | 0 (0%)                                 | 0 (0%)                                 | 0 (0%)                                    | 0 (0%)                               | N/A                                             | 0.1                                    | 0 (0%)                          |
| 2  | Anderson et al. – 1970 [64]     | Case report V                    | 1 / 1 (100%)       | 6                        | Body                                                             | Unilateral                                                 | 3-AA                                           | Biopsy                                              | No                                                     | 0 (0%)                                           | 1 (100%)                               | 0 (0%)                                 | 1 (100%)                                  | 0 (0%)                               | N/A                                             | 5                                      | 1 (100%)                        |
| 3  | Zant et al. – 1982 [65]         | Case report V                    | 1 / 0 (0%)         | 53                       | Splenium                                                         | Butterfly                                                  | 4-GBM                                          | Biopsy                                              | No                                                     | 0 (0%)                                           | 1 (100%)                               | 0 (0%)                                 | 1 (100%)                                  | 0 (0%)                               | N/A                                             | 4                                      | 0 (0%)                          |
| 4  | Kato et al. – 1990 [66]         | Case report V                    | 1 / 1 (100%)       | 66                       | Genu                                                             | Butterfly                                                  | 4-GBM                                          | PR                                                  | No                                                     | Persistent                                       | 0 (0%)                                 | 0 (0%)                                 | 0 (0%)                                    | 0 (0%)                               | N/A                                             | 1                                      | 0 (0%)                          |
| 5  | Lindboe et al. – 1992 [67]      | Case report V                    | 1 / 1 (100%)       | 63                       | Genu                                                             | Butterfly                                                  | 1-SE                                           | STR                                                 | No                                                     | Persistent                                       | 0 (0%)                                 | 0 (0%)                                 | 0 (0%)                                    | 0 (0%)                               | N/A                                             | 0.1                                    | 0 (0%)                          |
| 6  | Bauman et al. – 1998 [21]       | Case series IV                   | 2 / 2 (100%)       | 53 (42-64)               | Genu 2 (100%)                                                    | Butterfly 2 (100%)                                         | 3-AA 1 (50%) 4-GBM 1 (50%)                     | Biopsy 2 (100%)                                     | No 2 (100%)                                            | 0 (0%)                                           | 2 (100%)                               | 2 (100%)                               | 0 (0%)                                    | 0 (0%)                               | N/A                                             | 1.5                                    | 0 (0%)                          |
| 7  | Ideguchi et al. – 1998 [22]     | Case report V                    | 1 / 1 (100%)       | 72                       | Splenium                                                         | Butterfly                                                  | 3-AA                                           | STR                                                 | No                                                     | Persistent                                       | 0 (0%)                                 | 0 (0%)                                 | 1 (100%)                                  | 0 (0%)                               | N/A                                             | 0.5                                    | 0 (0%)                          |
| 8  | Bampoe et al. – 1999 [23]       | Case report V                    | 1 / 1 (100%)       | 52                       | Genu/Body                                                        | Butterfly                                                  | 3-AA                                           | STR                                                 | No                                                     | Transient                                        | 1 (100%)                               | 0 (0%)                                 | 1 (100%)                                  | 0 (0%)                               | N/A                                             | 4                                      | 1 (100%)                        |
| 9  | Duffau et al. – 2004 [9]        | Case series IV                   | 32 / 15 (46.9%)    | 36 (22-55)               | Body 12 (37.5%) Genu 10 (31.2%) Genu/Body 5 (15.6%)              | Unilateral 32 (100%)                                       | 2-A 32 (100%)                                  | STR 18 (56.2%) GTR 9 (28.1%) PR 5 (15.6%)           | Yes 32 (100%)                                          | Transient 25 (78.1%) Persistent 1 (3.1%)         | 0 (0%)                                 | 0 (0%)                                 | 31 (96.9%)                                | 2 (6.2%)                             | 42 (12-72)                                      | 36 (9-84)                              | 32 (100%)                       |
| 10 | Price et al. – 2004 [24]        | Case report V                    | 1 / 0 (0%)         | 59                       | Genu                                                             | Butterfly                                                  | 4-GBM                                          | STR                                                 | No                                                     | 0 (0%)                                           | 0 (0%)                                 | 0 (0%)                                 | 1 (100%)                                  | 1 (100%)                             | 1.5                                             | 2                                      | 1 (100%)                        |
| 11 | Pallud et al – 2005 [25]        | Case report V                    | 1 / 0 (0%)         | 25                       | Genu/Body                                                        | Butterfly                                                  | 3-AODG                                         | PR                                                  | No                                                     | 0 (0%)                                           | 1 (100%)                               | 1 (100%)                               | 1 (100%)                                  | 0 (0%)                               | N/A                                             | 6                                      | 1 (100%)                        |
| 12 | Voloschin et al. – 2005 [26]    | Case report V                    | 1 / 0 (0%)         | 38                       | Genu                                                             | Unilateral                                                 | 3-AODG                                         | GTR                                                 | No                                                     | 0 (0%)                                           | 0 (0%)                                 | 1 (100%)                               | 1 (100%)                                  | 0 (0%)                               | N/A                                             | 7                                      | 1 (100%)                        |
| 13 | Zakrzewska et al. – 2007 [27]   | Case report V                    | 1 / 1 (100%)       | 16                       | Body                                                             | Butterfly                                                  | 4-GBM                                          | PR                                                  | No                                                     | 0 (0%)                                           | 0 (0%)                                 | 0 (0%)                                 | 0 (0%)                                    | 1 (100%)                             | 1                                               | 1.1                                    | 0 (0%)                          |
| 14 | Tsutsumi et al. – 2008 [28]     | Case report V                    | 1 / 0 (0%)         | 11                       | Genu                                                             | Butterfly                                                  | 4-GBM                                          | STR                                                 | No                                                     | 0 (0%)                                           | 0 (0%)                                 | 1 (100%)                               | 0 (0%)                                    | 1 (100%)                             | 0.2                                             | 5.1                                    | 0 (0%)                          |
| 15 | Agrawal et al. – 2009 [29]      | Case report V                    | 1 / 1 (100%)       | 70                       | Splenium                                                         | Butterfly                                                  | 4-GBM                                          | Biopsy                                              | No                                                     | 0 (0%)                                           | 0 (0%)                                 | 0 (0%)                                 | 0 (0%)                                    | 0 (0%)                               | N/A                                             | 1                                      | 0 (0%)                          |
| 16 | Steiger et al. – 2009 [30]      | Case series IV                   | 11 / 6 (54.5%)     | 37 (20-65)               | Genu 11 (100%)                                                   | Unilateral 11 (100%)                                       | 2-A 3 (27.3%) 2-ODG 1 (9.1%) 3-AOA 7 (63.6%)   | GTR 8 (72.7%) PR 3 (27.3%)                          | Yes 8 (72.7%) No 3 (27.3%)                             | Persistent 2 (18.1%)                             | 7 (63.6%)                              | 0 (0%)                                 | 9 (81.8%)                                 | 6 (54.5%)                            | 26 (5-32)                                       | 32 (12-116)                            | 8 (72.7%)                       |
| 17 | Kumar et al. – 2010 [31]        | Case report V                    | 1 / 1 (100%)       | 16                       | Splenium                                                         | Butterfly                                                  | 3-AA                                           | GTR                                                 | Yes                                                    | Persistent                                       | 0 (0%)                                 | 1 (100%)                               | 0 (0%)                                    | 0 (0%)                               | N/A                                             | 3                                      | 0 (0%)                          |
| 18 | Monaco et al. – 2011 [32]       | Case report V                    | 1 / 0 (0%)         | 52                       | Genu/Body                                                        | Butterfly                                                  | 2-ODG                                          | PR                                                  | Yes                                                    | 0 (0%)                                           | 1 (100%)                               | 0 (0%)                                 | 1 (100%)                                  | 0 (0%)                               | N/A                                             | 18                                     | 1 (100%)                        |
| 19 | Witoonpanich et al. – 2011 [33] | Case report V                    | 1 / 1 (100%)       | 64                       | Body/Splenium                                                    | Butterfly                                                  | 4-GBM                                          | Biopsy                                              | No                                                     | 0 (0%)                                           | 0 (0%)                                 | 0 (0%)                                 | 0 (0%)                                    | 0 (0%)                               | N/A                                             | 3                                      | 0 (0%)                          |
| 20 | Dziurzynskiet al. – 2012 [34]   | Case series IV                   | 23 / 11 (47.8%)    | 59 (30-77)               | Genu 13 (50%) Body 6 (26.1%) Splenium 3 (13%) Genu/Body 1 (4.3%) | Butterfly 23 (100%)                                        | 4-GBM 23 (100%)                                | Biopsy 12 (52.2%) GTR 6 (26.1%) PR 5 (21.7%)        | No 17 (73.9%) Yes 6 (26.1%)                            | N/A                                              | 12 (52.2%)                             | 9 (15.3%)                              | N/A                                       | N/A                                  | N/A                                             | 6 (0.1-34)                             | 0 (0%)                          |
| 21 | Chaichana et al. – 2014 [10]    | Case series IV                   | 48 / 25 (52.1%)    | 60 (40-72)               | N/A                                                              | Butterfly 48 (100%)                                        | 4-GBM 48 (100%)                                | Biopsy 19 (39.6%) STR 19 (39.6%) PR 10 (20.8%)      | No 48 (100%)                                           | Persistent 9 (18.8%)                             | 32 (66.7%)                             | 29 (60.4%)                             | N/A                                       | N/A                                  | N/A                                             | 6 (0.1-36)                             | 0 (0%)                          |
| 22 | Lee et al. – 2014 [35]          | Case report V                    | 1 / 0 (0%)         | 30                       | Genu                                                             | Unilateral                                                 | 3-AA                                           | GTR                                                 | No                                                     | 0 (0%)                                           | 1 (100%)                               | 0 (0%)                                 | 1 (100%)                                  | 0 (0%)                               | N/A                                             | 8                                      | 1 (100%)                        |
| 23 | Chen et al. – 2015 [36]         | Case series IV                   | 33 / 19 (57.6%)    | 50 (28-78)               | N/A                                                              | Butterfly 23 (69.7%) Unilateral 10 (30.3%)                 | 2-A 11 (33.3%) 3-AA 4 (12.1%) 4-GBM 18 (54.6%) | PR 20 (60.6%) STR 13 (39.4%)                        | No 33 (100%)                                           | N/A                                              | N/A                                    | N/A                                    | N/A                                       | 17 (51.5%)                           | 8 (0.5-24)                                      | 14 (0.1-60)                            | 8 (24.2%)                       |
| 24 | Burks et al. – 2016 [37]        | Case series IV                   | 40 / 29 (72.5%)    | 49 (24-77)               | Genu/Body 40 (100%)                                              | Butterfly 40 (100%)                                        | 2-A 13 (32.5%) 3-AA 6 (15%) 4-GBM 21 (52.5%)   | GTR 33 (82.5%) STR 7 (17.5%)                        | Yes 40 (100%)                                          | Transient 4 (10%) Persistent 20 (50%)            | N/A                                    | N/A                                    | N/A                                       | N/A                                  | N/A                                             | 15 (5-18)                              | 30 (75%)                        |
| 25 | Hu et al. – 2016 [38]           | Case report V                    | 1 / 0 (0%)         | 44                       | Genu/Body                                                        | Butterfly                                                  | 4-GBM                                          | GTR                                                 | Yes                                                    | Persistent                                       | 0 (0%)                                 | 0 (0%)                                 | 1 (100%)                                  | 1 (100%)                             | 3                                               | 7                                      | 1 (100%)                        |
| 26 | Yapıcı-Eser et al. – 2016 [39]  | Case report V                    | 1 / 0 (0%)         | 46                       | Body/Splenium                                                    | Butterfly                                                  | 4-GBM                                          | PR                                                  | Yes                                                    | 0 (0%)                                           | 0 (0%)                                 | 0 (0%)                                 | 1 (100%)                                  | 0 (0%)                               | N/A                                             | 0.5                                    | 1 (100%)                        |
| 27 | Krishnan et al. – 2017 [40]     | Case report V                    | 1 / 1 (100%)       | 54                       | Genu                                                             | Butterfly                                                  | 4-GBM                                          | Biopsy                                              | No                                                     | 0 (0%)                                           | 1 (100%)                               | 0 (0%)                                 | 0 (0%)                                    | 0 (0%)                               | N/A                                             | 3                                      | 1 (100%)                        |

|    |                                    |                |                 |              |                                                                                                         |                                              |                                                                                       |                                                                   |                                 |                                             |            |            |            |            |               |                |            |
|----|------------------------------------|----------------|-----------------|--------------|---------------------------------------------------------------------------------------------------------|----------------------------------------------|---------------------------------------------------------------------------------------|-------------------------------------------------------------------|---------------------------------|---------------------------------------------|------------|------------|------------|------------|---------------|----------------|------------|
| 28 | Mistry et al. – 2017 [41]          | Case series IV | 52 / 29 (55.8%) | 61 (20-82)   | N/A                                                                                                     | N/A                                          | 4-GBM 52 (100%)                                                                       | STR 30 (57.7%)<br>GTR 22 (42.3%)                                  | Yes 52 (100%)                   | N/A                                         | 52 (100%)  | 52 (100%)  | N/A        | 9 (17.3%)  | 4 (0.1-32)    | 7.2 (0.1-48.5) | 2 (3.8%)   |
| 29 | Yang et al. – 2017 [42]            | Case series IV | 43 / 21 (48.8%) | 54 (21-67)   | N/A                                                                                                     | Butterfly 43 (100%)                          | 4-GBM 43 (100%)                                                                       | STR 41 (95.4%)<br>GTR 2 (4.6%)                                    | No 41 (95.4%)<br>Yes 2 (4.6%)   | N/A                                         | 21 (48.8%) | 35 (81.3%) | N/A        | N/A        | N/A           | 10.7 (6-17)    | 2 (4.6%)   |
| 30 | Amoroso et al. – 2018 [43]         | Case report V  | 1 / 0 (0%)      | 74           | Genu                                                                                                    | Unilateral                                   | 4-GBM                                                                                 | GTR                                                               | Yes                             | 0 (0%)                                      | 1 (100%)   | 0 (0%)     | 0 (0%)     | 1 (100%)   | 11            | 24             | 0 (0%)     |
| 31 | Dayani et al. – 2018 [44]          | Case series IV | 39 / 23 (59%)   | 55 (20-83)   | Genu 19 (48.7%)<br>Splenium 11 (28.3%)<br>Body 5 (12.8%)<br>Genu/Body 4 (10.3%)                         | Butterfly 39 (100%)                          | 4-GBM 39 (100%)                                                                       | Biopsy 25 (64.1%)<br>STR 9 (23.1%)<br>PR 3 (7.7%)<br>GTR 2 (5.1%) | No 27 (69.2%)<br>Yes 12 (30.8%) | Transient 4 (28.6%)<br>Persistent 1 (7.1%)  | 22 (56.4%) | 17 (43.6%) | 2 (5.1%)   | N/A        | N/A           | 3.2 (0.3-25.9) | 0 (0%)     |
| 32 | Opoku-Darko et al. – 2018 [12]     | Case series IV | 29 / 18 (62.1%) | 60 (45-78)   | Genu/Body 15 (51.7%)<br>Body/Splenium 14 (48.3%)                                                        | Butterfly 29 (100%)                          | 4-GBM 29 (100%)                                                                       | Biopsy 20 (69%)<br>GTR 5 (17.2%)<br>PR 4 (13.8%)                  | No 24 (82.7%)<br>Yes 5 (17.3%)  | Persistent 3 (10.3%)                        | 19 (65.5%) | 19 (65.5%) | N/A        | N/A        | N/A           | 3.3 (0.1-24)   | 3 (10.3%)  |
| 33 | Azriel et al. – 2019 [45]          | Case report V  | 1 / 1 (100%)    | 58           | Body                                                                                                    | Corpus callosum only                         | 4-GBM                                                                                 | Biopsy                                                            | No                              | 0 (0%)                                      | 0 (0%)     | 0 (0%)     | 0 (0%)     | 0 (0%)     | N/A           | 1              | 0 (0%)     |
| 34 | Esfahani et al. – 2019 [46]        | Case report V  | 1 / 0 (0%)      | 9            | Body                                                                                                    | Unilateral                                   | 4-GBM                                                                                 | GTR                                                               | Yes                             | 0 (0%)                                      | 0 (0%)     | 0 (0%)     | 0 (0%)     | 0 (0%)     | N/A           | 1              | 0 (0%)     |
| 35 | La Rocca et al. – 2019 [47]        | Case report V  | 1 / 0 (0%)      | 48           | Splenium                                                                                                | Butterfly                                    | 4-GBM                                                                                 | Biopsy                                                            | No                              | 0 (0%)                                      | 1 (100%)   | 1 (100%)   | 0 (0%)     | 0 (0%)     | N/A           | 3              | 0 (0%)     |
| 36 | Sander et al. – 2019 [48]          | Case report V  | 1 / 0 (0%)      | 63           | Splenium                                                                                                | Butterfly                                    | 4-GBM                                                                                 | PR                                                                | No                              | Persistent                                  | 1 (100%)   | 1 (100%)   | 1 (100%)   | 1 (100%)   | 12            | 16             | 0 (0%)     |
| 37 | Werner et al. – 2019 [49]          | Case report V  | 1 / 1 (100%)    | 60           | Body                                                                                                    | Butterfly                                    | 4-GBM                                                                                 | Biopsy                                                            | No                              | 0 (0%)                                      | 1 (100%)   | 1 (100%)   | 0 (0%)     | 1 (100%)   | 10            | 11             | 0 (0%)     |
| 38 | Bouali et al. – 2020 [50]          | Case report V  | 1 / 1 (100%)    | 0.5          | Genu/Body                                                                                               | Unilateral                                   | 4-GS                                                                                  | GTR                                                               | Yes                             | 0 (0%)                                      | 0 (0%)     | 0 (0%)     | 1 (100%)   | 1 (100%)   | 17            | 17             | 0 (0%)     |
| 39 | De Macedo Filho et al. – 2020 [51] | Case report V  | 1 / 1 (100%)    | 44           | Body/Splenium                                                                                           | Butterfly                                    | 4-GS                                                                                  | STR                                                               | No                              | Persistent                                  | 1 (100%)   | 1 (100%)   | 0 (0%)     | 1 (100%)   | 1             | 1.5            | 0 (0%)     |
| 40 | Finneran et al. – 2020 [52]        | Case report V  | 1 / 0 (0%)      | 44           | Genu/Body                                                                                               | Butterfly                                    | 4-GBM                                                                                 | Biopsy                                                            | No                              | 0 (0%)                                      | 1 (100%)   | 1 (100%)   | 1 (100%)   | 1 (100%)   | 36            | 60             | 0 (0%)     |
| 41 | Forster et al. – 2020 [53]         | Case series IV | 21 / 9 (%)      | 41 (24-76)   | N/A                                                                                                     | Unilateral 13 (61.9%)<br>Butterfly 8 (38.1%) | 2-ODG 2 (9.5%)<br>2-A 1 (4.8%)<br>4-GBM 17 (81%)                                      | GTR 15 (71.4%)<br>STR 6 (28.6%)                                   | Yes 21 (100%)                   | Transient 6 (28.6%)<br>Persistent 2 (9.5%)  | 18 (85.7%) | 17 (81%)   | 4 (19%)    | 3 (14.3%)  | 12.5 (7.6-19) | 12.6 (2-30.9)  | 12 (57.1%) |
| 42 | Jamshidi et al. – 2020 [54]        | Case series IV | 3 / 2 (66.7%)   | 61 (59-73)   | Splenium 2 (66.7%)<br>Genu 1 (33.3%)                                                                    | Butterfly 3 (100%)                           | 4-GBM 3 (100%)                                                                        | Biopsy 3 (100%)                                                   | No 3 (100%)                     | 0 (0%)                                      | 3 (100%)   | 3 (100%)   | 3 (100%)   | 0 (0%)     | N/A           | 8 (1-8)        | 3 (100%)   |
| 43 | McKinnon et al. – 2020 [55]        | Case series IV | 2 / 0 (0%)      | 46.5 (33-60) | Splenium 2 (100%)                                                                                       | Butterfly 1 (50%)<br>Unilateral 1 (50%)      | 1-GG 1 (50%)<br>4-GBM 1 (50%)                                                         | STR 2 (100%)                                                      | Yes 2 (100%)                    | Transient 1 (50%)<br>Persistent 1 (50%)     | 1 (50%)    | 1 (50%)    | 2 (100%)   | 0 (0%)     | N/A           | 3              | 2 (100%)   |
| 44 | Sato et al. – 2020 [56]            | Case report V  | 1 / 1 (100%)    | 77           | Genu/Body                                                                                               | Unilateral                                   | 4-GBM                                                                                 | GTR                                                               | Yes                             | Permanent                                   | 1 (100%)   | 1 (100%)   | 1 (100%)   | 1 (100%)   | 7             | 15             | 0 (0%)     |
| 45 | Alshoabi et al. – 2021 [57]        | Case report V  | 1 / 1 (100%)    | 48           | Body/Splenium                                                                                           | Butterfly                                    | 2-A                                                                                   | Biopsy                                                            | No                              | 0 (0%)                                      | 0 (0%)     | 0 (0%)     | 0 (0%)     | 0 (0%)     | N/A           | 0.1            | 0 (0%)     |
| 46 | Boaro et al. – 2021 [13]           | Case series IV | 62 / 32 (%)     | 64 (45-76)   | Genu 26 (41.9%)<br>Splenium 22 (35.5%)<br>Body 14 (22.6%)                                               | Butterfly 62 (100%)                          | 4-GBM 62 (100%)                                                                       | Biopsy 36 (58.1%)<br>STR 23 (37.1%)<br>GTR 3 (4.8%)               | No 36 (58.1%)<br>Yes 26 (41.9%) | Transient 5 (8.1%)<br>Persistent 14 (22.6%) | 47 (75.8%) | 44 (71%)   | N/A        | 35 (56.5%) | 5.9 (2-9)     | 8.7 (0.5-26)   | 15 (24.2%) |
| 47 | Cui et al. – 2021 [14]             | Case series IV | 77 / 43 (%)     | 50 (38-78)   | Genu 46 (59.7%)<br>Genu/Body 11 (14.3%)<br>Splenium 10 (13%)<br>Body 7 (9.1%)<br>Body/Splenium 3 (3.9%) | Butterfly 77 (100%)                          | 4-GBM 77 (100%)                                                                       | GTR 41 (53.2%)<br>STR 23 (29.9%)<br>PR 13 (16.9%)                 | Yes 77 (100%)                   | N/A                                         | 57 (74%)   | 77 (100%)  | N/A        | 51 (66.2%) | 10 (0.3-51)   | 15 (0.1-52)    | 17 (22.1%) |
| 48 | Franco et al. – 2021 [58]          | Case series IV | 55 / 34 (%)     | 64 (48-81)   | Genu 27 (49%)<br>Body 11 (20%)<br>Body/Splenium 6 (11%)<br>Splenium 6 (11%)<br>Genu/Body 5 (9%)         | N/A                                          | 4-GBM 55 (100%)                                                                       | Biopsy 30 (54.5%)<br>STR 17 (30.9%)<br>GTR 8 (14.5%)              | No 30 (54.5%)<br>Yes 25 (45.5%) | Persistent 13 (20.3%)                       | 19 (34.5%) | 29 (52.7%) | 18 (32.7%) | N/A        | N/A           | 8.4 (0.1-43.3) | 10 (18.2%) |
| 49 | Kayahara et al. – 2021 [59]        | Case report V  | 1 / 0 (0%)      | 22           | Splenium                                                                                                | Unilateral                                   | 1-PA                                                                                  | GTR                                                               | Yes                             | Transient                                   | 0 (0%)     | 0 (0%)     | 1 (100%)   | 0 (0%)     | N/A           | 36             | 1 (100%)   |
| 50 | Shibahara et al. – 2021 [60]       | Case series IV | 8 / 4 (50%)     | 56 (27-69)   | Splenium 8 (100%)                                                                                       | Unilateral 8 (100%)                          | 2-A 2 (25%)<br>4-GBM 6 (75%)                                                          | GTR 5 (62.5%)<br>PR 2 (25%)<br>STR 1 (12.5%)                      | Yes 8 (100%)                    | N/A                                         | N/A        | N/A        | N/A        | N/A        | N/A           | 6 (1-12)       | 8 (100%)   |
| 51 | Dadario et al. – 2022 [62]         | Case series IV | 70 / 43 (%)     | 49 (18-73)   | Genu 47 (78%)<br>Splenium 19 (27%)<br>Body 4 (6%)                                                       | Butterfly 70 (100%)                          | 2-A 4 (5.7%)<br>3-AODG 3 (4.3%)<br>3-AA 2 (2.9%)<br>4-GBM 60 (85.7%)<br>4-GS 1 (1.4%) | GTR 63 (90%)<br>STR 7 (10%)                                       | Yes 70 (100%)                   | Persistent 21 (30%)                         | 70 (100%)  | 70 (100%)  | N/A        | N/A        | N/A           | 14 (1-53)      | 12 (17.1%) |
| 52 | Sharma et al. – 2022 [63]          | Case report V  | 1 / 1 (100%)    | 60           | Genu/Body                                                                                               | Butterfly                                    | 4-GBM                                                                                 | Biopsy                                                            | No                              | 0 (0%)                                      | 0 (0%)     | 0 (0%)     | 0 (0%)     | 0 (0%)     | N/A           | 0.1            | 0 (0%)     |

**Abbreviations:** **A**, Astrocytoma; **AA**, Anaplastic astrocytoma; **AOA**, Anaplastic oligoastrocytoma; **AODG**, Anaplastic oligodendroglioma; **GBM**, Glioblastoma; **GG**, Ganglioglioma; **GS**, Gliosarcoma; **GTR**, Gross-total resection (90-100%); **ODG**, oligodendroglioma; **PA**, Pilocytic astrocytoma; **PR**, Partial resection (<80%); **SE**, Subependymoma; **STR**, Subtotal resection (80-90%).
