# Supplementary material for: Gliomas Infiltrating the Corpus Callosum: A Systematic Review of the Literature
Source: Cancers (Basel). 2022 May 19;14(10):2507. doi: 10.3390/cancers14102507 (PMC9139932; doi:10.3390/cancers14102507)
Supplement: Supplementary file 1 [file cancers-14-02507-s001.zip › Supplementary File 2 - Risk of bias assessment for included studies.pdf]

### Supplementary File S2. Risk of bias assessments for included studies

| <b>Joanna Briggs Institute Checklist for Case Reports – Criteria</b>                    |
|-----------------------------------------------------------------------------------------|
| 1. Were patient’s demographic characteristics clearly described?                        |
| 2. Was the patient’s history clearly described and presented as a timeline?             |
| 3. Was the current clinical condition of the patient on presentation clearly described? |
| 4. Were diagnostic tests or assessment methods and the results clearly described?       |
| 5. Was the intervention(s) or treatment procedure(s) clearly described?                 |
| 6. Was the post-intervention clinical condition clearly described?                      |
| 7. Were adverse events (harms) or unanticipated events identified and described?        |
| 8. Does the case report provide takeaway lessons?                                       |
| <b>Responses Options:</b> Yes, No, Unclear, Not Applicable (NA)                         |
| <b>Quality Rating:</b> Poor 0 – 2; Fair 3 – 5; Good 6 – 8                               |

[illegible]

[illegible]

| <b>Joanna Briggs Institute Checklist for Case Series – Criteria</b>                                              |
|------------------------------------------------------------------------------------------------------------------|
| 1. Were there clear criteria for inclusion in the case series?                                                   |
| 2. Was the condition measured in a standard, reliable way for all participants included in the case series?      |
| 3. Were valid methods used for identification of the condition for all participants included in the case series? |
| 4. Did the case series have consecutive inclusion of participants?                                               |
| 5. Did the case series have complete inclusion of participants?                                                  |
| 6. Was there clear reporting of the demographics of the participants in the study?                               |
| 7. Was there clear reporting of clinical information of the participants?                                        |
| 8. Were the outcomes or follow up results of cases clearly reported?                                             |
| 9. Was there clear reporting of the presenting site(s)/clinic(s) demographic information?                        |
| 10. Was statistical analysis appropriate?                                                                        |
| <b>Responses Options:</b> Yes, No, Unclear, Not Applicable (NA)                                                  |
| <b>Quality Rating:</b> Poor 0 – 3; Fair 4 – 7; Good 8 – 10                                                       |

| <b>Study</b>                            | <b>1</b> | <b>2</b> | <b>3</b> | <b>4</b> | <b>5</b> | <b>6</b> | <b>7</b> | <b>8</b> | <b>9</b> | <b>10</b> | <b>Rating</b> |
|-----------------------------------------|----------|----------|----------|----------|----------|----------|----------|----------|----------|-----------|---------------|
| Bauman et al. – 1998 <sup>21</sup>      | Yes      | No       | NA        | 8 – Good      |
| Duffau et al. – 2004 <sup>9</sup>       | Yes      | No       | NA        | 8 – Good      |
| Steiger et al. – 2009 <sup>30</sup>     | Yes      | No       | NA        | 8 – Good      |
| Dziurzynski et al. – 2012 <sup>34</sup> | Yes       | 10 – Good     |
| Chaichana et al. – 2014 <sup>10</sup>   | Yes      | No       | Yes       | 9 – Good      |
| Chen et al. – 2015 <sup>36</sup>        | Yes      | No       | Yes       | 9 – Good      |
| Burks et al. – 2016 <sup>37</sup>       | Yes       | 10 – Good     |
| Mistry et al. – 2017 <sup>41</sup>      | Yes       | 10 – Good     |
| Yang et al. – 2017 <sup>42</sup>        | Yes       | 10 – Good     |
| Dayani et al. – 2018 <sup>44</sup>      | Yes       | 10 – Good     |
| Opoku-Darko et al. – 2018 <sup>12</sup> | Yes       | 10 – Good     |
| Forster et al. – 2020 <sup>53</sup>     | Yes      | No       | NA        | 8 – Good      |
| Jamshidi et al. – 2020 <sup>54</sup>    | Yes      | No       | NA        | 8 – Good      |
| McKinnon et al. – 2020 <sup>55</sup>    | Yes      | No       | NA        | 8 – Good      |
| Boaro et al. – 2021 <sup>13</sup>       | Yes       | 10 – Good     |
| Cui et al. – 2021 <sup>14</sup>         | Yes      | No       | Yes       | 9 – Good      |
| Franco et al. – 2021 <sup>58</sup>      | Yes       | 10 – Good     |
| Shibahara et al. – 2021 <sup>60</sup>   | Yes      | NA        | 9 – Good      |
| Dadario et al. – 2022 <sup>62</sup>     | Yes      | No       | NA        | 8 – Good      |
